# Supplementary material for: Appraisal of Pancreatic Lipase Inhibitory Potential of Ziziphus oenoplia (L.)Mill. Leaves by In Vitro and In Silico Approaches
Source: PubMed Central journal article supplement — ACS Omega. 2023 May 5;8(19):16630–46. doi: 10.1021/acsomega.2c07361 (PMC10193397; doi:10.1021/acsomega.2c07361), 2023-05-05
Supplement: ao2c07361_si_001.pdf [file ao2c07361_si_001.pdf]

## **Supporting Information**

### **An Appraisal of Pancreatic Lipase inhibitory Potential of *Ziziphus oenoplia* (L.) Mill. leaves by *In-vitro* and *In-silico* Approaches**

Srinivasa R Vulichi<sup>1,2\*</sup>, Ashish Runthala<sup>3</sup>, Siva K Rachamreddy<sup>1</sup>, Radhika S P Yaramanedi<sup>1</sup>, Partha Sarathi Sahoo<sup>3</sup>, Prasad V L S Burra<sup>3</sup>, Nameet Kaur<sup>4</sup>, Sudheer Akkiraju<sup>5</sup>, Somasekhar Reddy Kanala<sup>5</sup>, Appa Rao Chippada<sup>1,6</sup>, Sistla Durga Srinivasa Murthy<sup>6</sup>

<sup>1</sup>S V University College of Pharmaceutical Sciences, S V University, Tirupati, Andhra Pradesh, India.

<sup>2</sup>BITS, Pilani, Hyderabad Campus, Jawahar Nagar, Hyderabad, Telangana State, India.

<sup>3</sup>Department of Biotechnology, Koneru Lakshmaiah Education Foundation, Vijayawada, Andhra Pradesh, India.

<sup>4</sup>Operon Technologies, New Delhi, India.

<sup>5</sup>Department of Pharmacology, RIPER, Anantapur, Andhra Pradesh, India.

<sup>6</sup>Department of Biochemistry, S V University, Tirupati, Andhra Pradesh, India.

\*Corresponding Authors

Email: [nivschem@gmail.com](mailto:nivschem@gmail.com), [ashish.runthala@gmail.com](mailto:ashish.runthala@gmail.com)

**Table S1.** Details of the respective chemical analogues of the best five lead-like molecules in descending order of their binding affinity scores (in kcal/mol) confirmed through docking analysis.

| S. No | PubChem CID | Binding affinity (kcal/mol) |
|-------|-------------|-----------------------------|
| 1.    | 132582306   | -9.3                        |
| 2.    | 11260294    | -8.8                        |
| 3.    | 44440845    | -8.7                        |
| 4.    | 163020300   | -8.7                        |
| 5.    | 22288010    | -8.6                        |
| 6.    | 53398699    | -8.6                        |
| 7.    | 131752285   | -8.5                        |
| 8.    | 442725      | -8.5                        |
| 9.    | 44147684    | -8.5                        |
| 10.   | 14887606    | -8.4                        |
| 11.   | 162941227   | -8.4                        |
| 12.   | 102353416   | -8.3                        |
| 13.   | 11248556    | -8.3                        |
| 14.   | 131751472   | -8.3                        |
| 15.   | 159460      | -8.3                        |
| 16.   | 73981696    | -8.3                        |

|     |           |      |
|-----|-----------|------|
| 17. | 12302035  | -8.2 |
| 18. | 12443368  | -8.2 |
| 19. | 5748594   | -8.2 |
| 20. | 5321398   | -8.2 |
| 21. | 14861229  | -8.2 |
| 22. | 14681458  | -8.2 |
| 23. | 11546834  | -8.1 |
| 24. | 5918474   | -8.1 |
| 25. | 10095770  | -8.0 |
| 26. | 134926872 | -8.0 |
| 27. | 14861226  | -8.0 |
| 28. | 74977829  | -8.0 |
| 29. | 21603474  | -7.8 |
| 30. | 10454451  | -7.7 |
| 31. | 131752176 | -7.7 |
| 32. | 6451798   | -7.7 |
| 33. | 5318659   | -7.7 |
| 34. | 44257871  | -7.7 |

|     |            |      |
|-----|------------|------|
| 35. | 5370466    | -7.6 |
| 36. | 162907626  | -7.6 |
| 37. | 85362951   | -7.5 |
| 38. | 162901393  | -7.5 |
| 39. | 44258317   | -7.4 |
| 40. | 16037498   | -7.4 |
| 41. | 1102158311 | -7.2 |
| 42. | 24806298   | -6.8 |
| 43. | 4419068    | -6.0 |
| 44. | 53589131   | -5.7 |

---
